# Beyond species: why ecological interactions vary through space and time

T. Poisot, D.B. Stouffer & D. Gravel

Working paper

Community ecology is tasked with the considerable challenge of predicting the structure, and properties, of emerging ecosystems. It requires the ability to understand how and why species interact, as this will allow the development of mechanism-based predictive models, and as such to better characterize how ecological mechanisms act locally on the existence of inter-specific interactions. Here we argue that the current conceptualization of species interaction networks is ill-suited for this task. Instead, we propose that future research must start to account for the intrinsic variability of interaction networks. This can be accomplished simply by recognizing that there exists intra-specific variability, in traits or properties related to the establishment of species interactions. By shifting the scale towards population-based processes, we show that this new approach will improve our predictive ability and mechanistic understanding of how species interact over biogeographical scales.

## Introduction

Ecological interactions are the driving force behind ecological dynamics within communities (Berlow *et al.*, 2009). Likely for this reason more than any, the structure of communities have been described by species interaction networks for over a century (Dunne, 2006). Formally an ecological network is a mathematical and conceptual representation of both *species*, and

the *interactions* they establish. Behind this conceptual framework is a rich and expanding literature whose primary focus has been to quantify how numerical and statistical properties of networks relate to their robustness (Dunne *et al.*, 2002), productivity (Duffy *et al.*, 2007), or tolerance to extinction (Memmott *et al.*, 2004). Although this approach classically focused on food webs (Ings *et al.*, 2009), it has proved particularly successful because it can be applied equally to all types of ecological interactions (Kéfi *et al.*, 2012).

This body of literature generally assumes that, short of changes in local densities due to ecological dynamics, networks are inherently *static* objects, which calls into question its relevance at biogeographic scales. More explicitly, if two species are known to interact at one location, it is often assumed that they will interact whenever and wherever they co-occur (see *e.g.* Havens, 1992); this neglects the fact that local environmental conditions, species states, and community composition, can intervene in the realization of interactions. More recently, however, it has been established that networks are *dynamic* objects that have structured variation in  $\alpha$ ,  $\beta$ , and  $\gamma$  diversity, not only to the change of species composition at different locations but also to the fact that the same species will interact in different ways over time or across their area of co-occurrence (Poisot *et al.*, 2012). Of these sources of variation in networks, the change of species composition has been addressed either explicitly in the context of networks (Gravel *et al.*, 2011; Dáttilo *et al.*, 2013), or within classical meta-community theory. However, because this literature mostly assumes that interactions happen consistently between species, it is ill-suited to address network variation as a whole, and needs be supplemented with new concepts and mechanisms.

Within the current paradigm, interactions are established between species, and are an immutable “property” of a species pair. Starting from empirical observations, expert knowledge, or literature surveys, one could collect a list of interactions for any given species pool. Several studies used this approach to extrapolate the structure of networks over time and space (Havens, 1992; Piechnik *et al.*, 2008; Baiser *et al.*, 2012), by considering that the network at *any* location is composed of *all* of the potential interactions known for this species pool. This stands in stark contrast with recent results showing that (i) the identities of interacting species

vary over space and (ii) the dissimilarity is not related to the dissimilarity in species composition (Poisot *et al.*, 2012). The current conceptual and operational tools to study networks leaves us poorly equipped to understand the causes of this variation. In this paper, we propose a general research agenda to understand the mechanisms involved in the variability of species interactions.

In contrast to the current paradigm, we propose that future research on interaction networks be guided by the following principles. First, at the regional scale, species interactions are best represented as a stochastic event. Second, the probability that two species will interact can be determined as a function of traits and local abundances. Third, the local observations of interactions can be viewed as the realization of a stochastic process, of which it is possible to measure or infer the probability that it happens at the regional level. This approach is outlined in **Box 1**. Although this proposal is an intuitive yet radical change in the way we think about ecological network structure, we demonstrate in this paper that it is well supported by empirical and theoretical results alike. What is more, our new perspective is well placed to open the door to novel predictive approaches integrating a range of key ecological mechanisms. Notably, we propose in **Box 2** that this approach facilitates the study of indirect interactions, for which predictive approaches have long proved elusive [atack\_can\_2011].

In a time where the next generation of predictive biogeographic models will need to account for species interactions (Thuiller *et al.*, 2013), it is crucial not to underestimate the fact that these interactions are not only ill described as constants, but are ecological objects with a geographic variability of their own. Indeed, investigating the impact of species interactions on species distributions only makes sense under the implicit assumption that species interactions themselves vary over biogeographical scales. Models of species distributions will therefore increase their predictive potential if they account for the variability of ecological interactions. In turn, tighter coupling between species distributions and interactions distributions models will allow accurate predictions of the properties of emerging ecosystems (Gilman *et al.*, 2010, ) and the spatial variability of properties between existing ecosystems. By paying more attention to the variability of species interactions, the field of biogeography will be able to re-visit

classical observations typically explained by species-level mechanisms: how does community complexity and function vary along latitudinal gradients, is there information hidden in the co-occurrence or avoidance of species interactions, etc.

In this paper, we outline the mechanisms that are involved in the variability of species interactions over time, space, and environmental gradients. We discuss how they will affect the structure of ecological networks, and how these mechanisms can be integrated into new predictive and statistical models (**Box 1**). Most importantly, we show that this approach integrates classical community ecology thinking and biogeographic questions (**Box 2**), and will ultimately result in a better understanding of the structure of ecological communities.

## The dynamic nature of ecological interaction networks

Recent studies on the sensitivity of network structure to environmental change provide some context for the study of dynamic networks. Menke et al. (2012) showed that the structure of a plant–frugivore network changed along a forest–farmland gradient. At the edges between two habitats, species were on average less specialized and interacted more evenly with a larger number of partners than they did in habitat cores. Differences in network structure have also been observed within forest strata that differ in their proximity to the canopy and visitation by birds (Schleuning *et al.*, 2011). Tylianakis et al. (2007) reports a *stronger* signal of spatial interaction turnover when working with quantitative rather than binary interactions, highlighting the importance of *measuring* rather than assuming the existence of interactions. Eveleigh et al. (2007) demonstrated that outbreaks of the spruce budworm were associated to changes in the structure of its trophic network, both in terms of species observed and their interactions. Poisot et al. (2011) used a microbial system of hosts and pathogens to study the impact of productivity gradients on realized infection; when the species were moved from high to medium to low productivity, some interactions were lost and others were gained. As a whole, these results suggest that the existence, and properties, of an interaction are not only contingent on the presence of the two species involved, but may also require particular

environmental conditions, including the presence or absence of species not directly involved in the interaction.

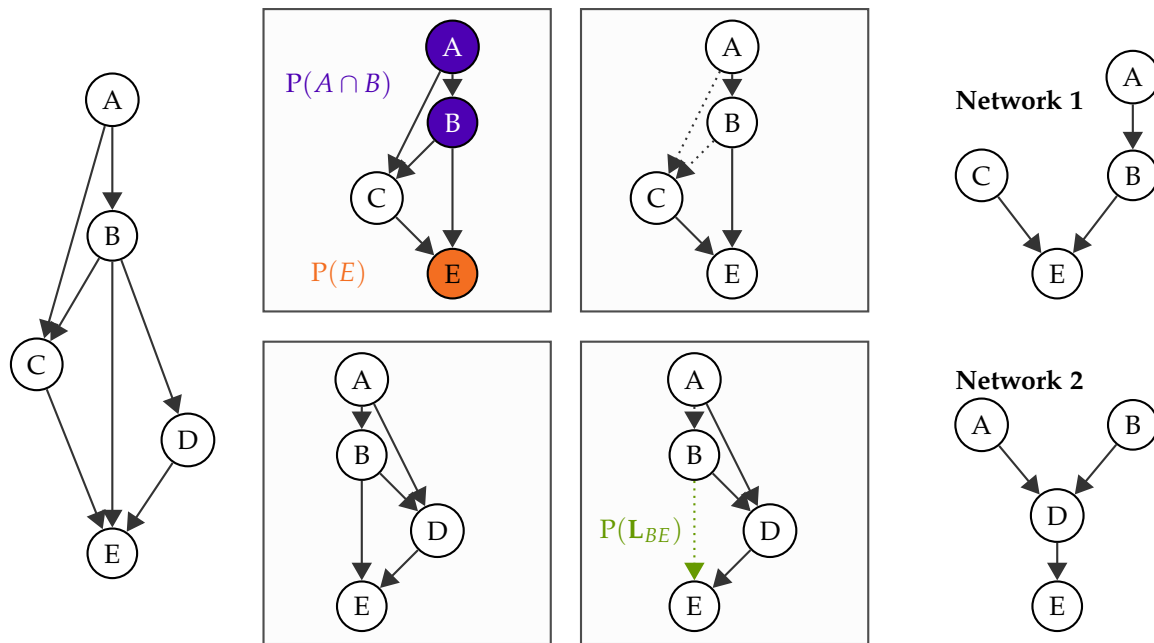

Figure 1: An illustration of the metaweb concept. In its simplest form, a metaweb is the list of all possible species and interactions between them for the system being studied, at the regional level (far left side). Everything that is ultimately observed in nature is a *realisation* of the metaweb (far right side), *i.e.* the resulting network after several sorting processes have occurred (central panel). First, species and species pairs have different probabilities to be observed (top panels). Second, as a consequence of the mechanisms we outline in this paper, not all interactions have the same probability to occur at any given site (bottom panels, see **Box 1**).

We argue here that there are three broadly-defined classes of mechanisms that ultimately determine the realization of species interactions. First, individuals must be in high enough local relative abundances to meet; this is the so-called “neutral” perspective of interactions. Second, there must be phenological matching between individuals, such that an interaction will actually occur given that the encounter takes place. Finally, the realization of an interaction is regulated by the interacting organisms’ surroundings, and should be studied in the context of indirect interactions. Below, we examine each of these mechanisms in turn, and we show how they integrate into a robust statistical framework in **Box 1**, and more broadly into a network context in **Box 2**. We propose that shifting our approach from the species level to the population level will result in a better appreciation of the mechanisms of network variations, which

will allow to develop mechanistic hypotheses for the comparison of community structure in space, time, or over environmental gradients.

## Population dynamics and neutral processes

Over the recent years, the concept of neutral dynamics has left a clear imprint on the analysis of ecological network structure, most notably in bipartite networks (Blüthgen *et al.*, 2006). Re-analysis of several host–parasite datasets, for example, showed that changes in local species abundances triggers variation in parasite specificity (Vazquez *et al.*, 2005). More generally, it is possible to predict the structure of trophic interactions given minimal assumptions about the distribution of species abundance (Canard *et al.*, 2012). In this section, we review recent studies investigating the consequences of neutral dynamics on the structure of interaction networks and show how variations in population size can lead directly to interaction turnover.

### The basic processes

As noted previously, for an interaction to occur between individuals from two populations, these individuals must first meet, then interact. Assuming that two populations occupy the same location and are active at the same time of the day/year, then the likelihood of an interaction is roughly proportional to the product of their relative abundance (Vázquez *et al.*, 2007). This means that individuals from two large populations are more likely to interact than individuals from two small populations, simply because they tend to meet more often. This approach can also be extended to the prediction of interaction strength (Blüthgen *et al.*, 2006; Vázquez *et al.*, 2007), *i.e.* how strong the consequences of the interaction will be. The neutral perspective predicts that locally-abundant species should have more partners, and locally-rare species should appear more specialized. In a purely neutral model (*i.e.* interactions happen entirely by chance, although the determinants of abundance can still be non-neutral), the identities of species do not matter, and it becomes easy to understand how this can lead to

a situation where the structure of local networks will vary since species vary regionally in abundance. Canard et al. (2012) proposed the term of “neutrally forbidden links” to refer to interactions that are phenologically feasible but not realized because of the underlying population size distribution. The identity of these neutrally forbidden links will vary over time and space, either by stochastic changes in population sizes or because population size responds deterministically (i.e. non-neutrally) to extrinsic drivers.

## Benefits for network analysis

It is important to understand how local variations in abundance, whether neutral or not, cascade up to affect the structure of interaction networks. One approach is to use simple statistical models to quantify the effect of population sizes on local interaction occurrence or strength (see *e.g.* Krishna *et al.*, 2008). These models can be further extrapolated to remove the contribution of neutrality to link strength, allowing us to work directly on the interactions as they are determined by traits (**Box 1**). Doing so allows us to compare the variation of neutral and non-neutral components of network structure over space and time. To achieve this goal, however, it is essential the future sampling of interaction networks (i) are replicated and (ii) include independent measurements of population sizes.

An additional benefit is that these data will also help refine neutral theory. Wootton (2005) made the point that deviations of empirical communities from neutral predictions were most often explained by species trophic interactions, which are notoriously, albeit intentionally, absent from the original formulation of the theory (Hubbell). Merging the two views will increase our explanatory power, and provide new ways to test neutral theory in interactive communities. It will also offer a new opportunity, namely to complete the integration of network structure with population dynamics. To date, most studies focused on the consequence of one species having a particular position within a food web on the dynamics of its biomass or abundance (Brose *et al.*, 2006; Berlow *et al.*, 2009; Stouffer & Bascompte, 2011; Saavedra *et al.*, 2011). Adopting this neutral perspective brings things full circle since the abundance

of a species will also dictate its position in the network: changes in abundance can lead to interactions being gained or lost, and these changes in abundance are in part caused by existing interactions (**Box 2**). For this reason, there is a potential to link species and interaction dynamics and, more importantly, to do so in a way which accounts for the interplay between the two. From a practical point of view, this requires repeated sampling of a system through time, so that changes in relative abundances can be related to changes in interaction strength (Yeakel *et al.*, 2012). Importantly, embracing the neutral view will force us to reconsider the causal relationship between resource dynamics and interaction strength; in a neutral context, both are necessarily interdependent, a fact which likely further increases the complexity of the feedbacks between them.

## Traits matching in space and time

Once individuals meet, whether they will interact is widely thought to be the product of an array of behavioral, phenotypic, cultural aspects, that can conveniently be referred to as a “trait-based process”. Two populations can interact when their traits values allow it, *e.g.* viruses are able to overcome host resistance, predators can capture the preys, trees provide enough shading for shorter grasses to grow. Non-matching traits will effectively prevent the existence of an interaction, as demonstrated by Olesen *et al.* (2011). Under this perspective, the existence of interactions can be mapped onto trait values, and interaction networks will consequently vary along with variation in local trait distribution. In this section, we review how trait-based processes impact network structure, how they can create variation, and the perspective they open for an evolutionary approach.

## The basic processes

There is considerable evidence that, at the species level, interaction partners are selected on the grounds of matching trait values. Random networks built on these rules exhibit realistic struc-



tural properties (Williams & Martinez, 2000; Stouffer *et al.*, 2005). Trait values, however, vary from population to population within species, and so it is expected that the local interactions will be contingent upon traits spatial distribution (Figure 2). The fact that the niche of a species can appear large if it is the aggregation of narrow but differentiated individual or population niches is now well established (Devictor & Clavellet *et al.*, 2010; Bolnick *et al.*, 2003), and it has also reinforced the need to understand intra-specific trait variation to describe the structure and dynamics of communities (Woodward *et al.*, 2010; Bolnick *et al.*, 2011). Nevertheless, this notion has yet to percolate into the literature on network structure, despite its most profound consequence: a species appearing generalist at the regional scale can easily be specialized in *each* of the patches it occupies. This reality has long been recognized by functional ecologists, which are now increasingly predicting the *variance* in traits of different populations within a species (Violle *et al.*, 2012).

Empirically, there are several examples of intraspecific trait variation resulting in extreme interaction turnover. A particularly spectacular example was identified by Ohba (2011) who describes how a giant waterbug is able to get hold of, and eventually consume, juveniles from a turtle species. This interaction can only happen when the turtle is small enough for the morphotraits of the bug to allow to consume it, and as such will vary throughout the developmental cycle of both species. Choh *et al.* (2012) demonstrated through behavioral assays that preys which evaded predation when young were more likely to predate juvenile predators than the “naive” individuals; their past interactions shaped behavioral traits that alter the network structure over time. These examples show that trait-based effects on networks can be observed even in the absence of genotypic variation (although we discuss this in the next section).

In the trait-based perspective, the existence of an interaction is an emergent property of the trait distribution of local populations: variations in one or both of these distributions, regardless of the mechanism involved (development, selection, plasticity, environment), are likely to alter the interaction. Importantly, when interaction-driving traits are subject to environmental forcing (for example, body size is expected to be lower in warm environments, Angilletta *et*

al. (2004)), there can be covariation between environmental conditions and the occurrence of interactions. Woodward et al. (2012) demonstrate that changes in food-web structure happen at the same time as changes in body mass in experimental macrocosms. Integrating trait variation over spatial or temporal gradients is a central concern at present if we are to understand, for example, network variation and its subsequent response to environmental change.

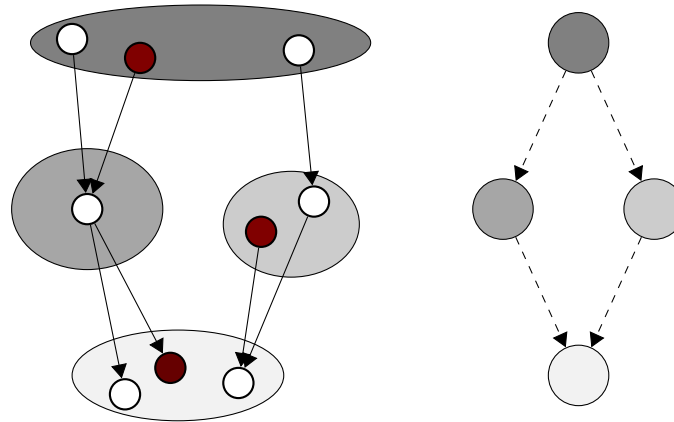

Figure 2: The left-hand side of this figure represents possible interactions between populations (circles) of four species (ellipses), and the aggregated species interaction network on the right. In this example, the populations and species level networks have divergent properties, and the inference on the system dynamics are likely to be different depending on the level of observation. More importantly, if the three populations highlighted in red were to co-occur, there would be no interactions between them, whereas the species-level network would predict a linear chain..

## Benefits for network analysis

Linking spatial and temporal trait variation with network variation will help identify the mechanistic basis of network dissimilarity. From a sampling point of view, having enough data requires that, when interactions are recorded, they are coupled with trait measurements. Importantly, these measurements cannot merely be extracted from a reference database because interactions are driven by *local* trait values and their matching across populations from different species. Within our overarching statistical framework (**Box 1**), we expect that (i) network variability at the *regional* scale will be dependent on the variation of population traits values, and (ii) variation between any series of networks will depend on the *covariance* between species traits. Although it requires considerably larger quantities of data to test, this approach

should allow us to infer *a priori* network variation. Given this next generation of data will also help link variation of network structure to variation of environmental conditions. Price shows how specific biomechanical responses to water input in shrubs can have pleiotropic effects on traits involved in the interaction with insects. In their system, the difference in network structure can be explained because (i) trait values determine the existence of an interaction, and (ii) environmental features determine trait values. We have little doubt that future empirical studies will provide similar mechanistic narratives.

At larger temporal scales, the current distribution of traits also reflects past evolutionary history (Diniz-Filho & Bini, 2008). Recognizing this important fact offers an opportunity to approach the evolutionary dynamics and variation of networks. Correlations between traits of different species, and between traits and fitness, drive coevolutionary dynamics (Gomulkiewicz *et al.*, 2000; Nuismer *et al.*, 2003). Both of these vary over space and time (Thompson, 2005), creating patchiness in the processes and outcomes of coevolution. Trait structure and trait correlations are also disrupted by migration (Gandon *et al.*, 2008; Burdon & Thrall, 2009). Ultimately, understanding of how ecological and evolutionary trait dynamics affect network structure will provide a mechanistic basis to the historical signal found in contemporary network structures (Rezende *et al.*, 2007; Eklof *et al.*, 2011; Baskerville *et al.*, 2011; Stouffer *et al.*, 2012).

## Beyond direct interactions

In this section, we argue that, although networks are built around observations of direct interactions like predation or pollination, they also offer a compelling tool with which to address indirect effects on the existence and strength of interactions. Any direct interaction arises from the “physical” interaction of only two species, and, as we have already detailed, these can be modified by local relative abundances and/or species traits. Indirect interactions, on the other hand, are established through the involvement of another party than the two focal species, either through cascading effects (herbivorous species compete with insect laying eggs

on plants) or through physical mediation of the environment (bacterial exudates increase the bio-availability of iron for all bacterial species; plants with large foliage provide shade for smaller species). As we discuss in this section, the fact that many (if not all) interactions are indirectly affected by the presence of other species (i) has relevance for understanding the variation of interaction network structure and (ii) can be studied within the classical network-theory formalism.

## The basic processes

Several authors (see Golubski & Abrams (2011) and references therein) have demonstrated that biotic interactions themselves interact, or in other words are contingent on the occurrence of other species. Because the outcome of an interaction ultimately affects local abundances (on ecological times) and population trait structure (over evolutionary times), all interactions happening within a community will impact one another. This does not actually mean pairwise approaches are bound to fail, but it does hearken for a larger scale approach that accounts for indirect effects.

The occurrence or absence of a biotic interaction can either affect either the realization of other interactions (thus affecting the “interaction” component of network  $\beta$ -diversity) or the presence of other species. There are several well-documented examples of one interaction allowing new interactions to happen (e.g. opportunistic pathogens have a greater success of infection on hosts which are already immunocompromised by previous infections Olivier (2012)), or conversely preventing them (a resident symbiont decreases the infection probability of a new pathogen (Koch & Schmid-Hempel, 2011; Heil & McKey, 2003)). In both cases, the driver of interaction turnover is the patchiness of species distribution; the species acting as a “modifier” of the interaction is only partially present throughout the range of the other two species, thus creating a mosaic of different interaction configurations. Variation in interaction structure can happen through both cascading and environmental effects: Singer et al. (2004) show that caterpillars change the proportion of different plant species in their diet, favoring low quality

items to load on chemical compounds which are toxic for their parasitoids. However, low quality food results in birds having a greater impact on caterpillar populations (Singer *et al.*, 2012). It is noteworthy that in this example, the existence of an interaction will affect both the strength, and impact, of other interactions. In terms of their effects on network  $\beta$ -diversity, indirect effects are thus likely to act on components of dissimilarity. A common feature of the examples mentioned here is that pinpointing the exact mechanism through which species interactions interfere often requires a good working knowledge of the system's natural history.

## Benefits for network analysis

Better understanding why and where species interact will provide a mechanistic understanding of observed species co-occurrences. However, the presence of species is also regulated by indirect interactions. Recent experimental work by Sanders & van Veen (2012) showed that some predator species can only be maintained if another predator species is present, since the latter regulates a competitively superior prey and allows for prey coexistence. These effects involving several species and several types of interactions across trophic levels are complex (and for this reason, have been deemed unpredictable in the past, @tack\_can\_2011), and can only be understood by comparing communities in which different species are present/absent. Looking at figure 1, it is also clear that the probability of having an interaction between species  $i$  and  $j$  ( $P(L_{ij})$ ) is ultimately constrained by the probability of simultaneously observing  $i$  and  $j$  together, *i.e.*  $P(i \cap j)$ . Thus, the existence of any ecological interaction will be contingent upon *other* ecological interactions driving local co-occurrence (Araújo *et al.*, 2011). Based on this argument, ecological networks cannot be limited to a collection of pairwise interactions. Our view of them needs be updated to account for the importance of the context surrounding these interactions (**Box 2**). From a biogeographic standpoint, it requires us to develop a theory based on interaction co-occurrence in addition to the current knowledge encompassing only species co-occurrence. Araújo *et al.* (2011) and Allesina & Levine (2011) introduced the idea that competitive interactions can leave a trace in species co-occurrence network. A direct consequence of this result is that, for example, trophic interactions are constrained by species'

competitive outcomes *before* they are ever constrained by predation-related traits. So as to fully understand interactions and their indirect effects, however, there is a need to develop new conceptual tools to *represent* effects that interactions have on one another. In a graph theoretical perspective, this would amount to establishing edges between pairs of edges, a task for which there is no conceptual or methodological background yet.

## Conclusions

Overall, we argue here that the notion of “species interaction networks” shifts our focus away from the level of organization at which most of the relevant biogeographic processes happen — populations. In order to make reliable predictions on the structure of networks, we need to understand what triggers variability of ecological interactions. In this contribution, we outlined that there are several direct (abundance-based and trait-based) and indirect (biotic modifiers, indirect effects of co-occurrence) effects to account for. We expect that the relative importance of each of these factors, and how precisely they affect the probability of establishing an interaction, are likely system-specific; nonetheless, we have proposed a unified conceptual approach to understand them better.

At the moment, the field of community ecology is severely data-limited to tackle this perspective. Despite the existence of several spatially- or temporally-replicated datasets (*e.g.* Schleuning *et al.*, 2011 ; 2012 ; Menke *et al.*, 2012), it is rare that all relevant information has been measured independently. It was recently concluded, however, that even a reasonably small subset of data can be enough to draw inferences at larger scales (Gravel *et al.*, 2013). Paradoxically, as tempting as it may be to sample a network in its entirety, the goal of establishing global predictions might be better furthered by extremely-detailed characterization of a more modest number of interactions (Rodriguez-Cabal *et al.*, 2013). Assuming that there are indeed statistical invariants in the rules governing interactions, this information will allow us to make verifiable predictions on the structure of the networks. Better still, this approach has the potential to substantially strengthen our understanding of the interplay between traits and neutral

effects. Blüthgen et al. (2008) claim that the impact of traits distribution on network structure can be inferred simply by removing the impact of neutrality (population densities), based on the idea that many rare links were instances of sampling artifacts. As illustrated here (e.g, **Box 2**), their approach is of limited generality, as the abundance of a species itself can be directly driven by factors such as trait-environment matching.

With the accumulation of data, these approaches will rapidly expand our ability to predict the re-wiring of networks under environmental change. The effect of environmental change is expected to occur because (i) population sizes will be affected by the change and (ii) either plastic or adaptive responses will shift or disrupt the trait distributions. The framework proposed in **Box 1** predicts interaction probabilities under different scenarios. Ultimately, being explicit about the trait-abundance-interaction feedback will provide a better understanding of short-term and long-term dynamics of interaction networks. We illustrate this in Fig. 3. The notion that population sizes have direct effects on the existence of an interaction stands opposed to classical consumer-resource theory, which is one of the bases of network analysis. Considering this an opposition, however, is erroneous. Consumer-resource theory considers a strong effect of abundance on the intensity of interactions (**Box 2**), and itself is a source of (quantitative) variation. Furthermore, these models are entirely determined by variations in population sizes in the limiting case where the coefficient of interactions are similar. As such, any approach seeking to understand the variation of interactions over space ought to consider that local densities are not only a consequence, but also a predictor, of the probability of observing an interaction. The same reasoning can be held for local trait distributions, although over micro-evolutionary time-scales. While traits values determine whether two species are able to interact, they will be modified by the selective effect of species interacting. Therefore, conceptualizing interactions as the outcome of a probabilistic process regulated by local factors, as opposed to a constant, offers the unprecedented opportunity to investigate feedbacks between different time scales.

Over the past decade, much insights were gained in looking at the turnover of different facets of biodiversity (taxonomic, functional, and phylogenetic) through space (Meynard *et al.*, 2011,

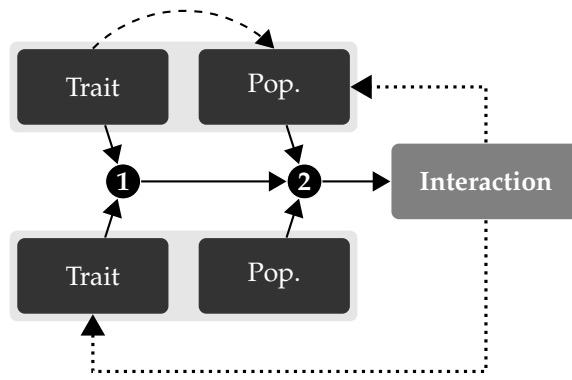

Figure 3: The approach we propose (that populations can interact at the conditions that **1** their trait allow it and **2** they are locally abundant enough to meet) requires to shift our focus to population-level processes. A compelling argument to work at this level of organisation is that eco-evolutionary feedbacks explicit. All of the components of interaction variability we described are potentially related, either through variations of population sizes due to the interaction, or due to selection stemming from these variations in population size. In addition, some traits involved in the existence of the interaction may also affect local population abundance. .

). Here, we propose that there is an oft-neglected side of biodiversity: species interactions. The perspective we bring forth allows us to unify these dimensions and offers us the opportunity to describe the biogeographic structure of all components of community and ecosystem structure simultaneously.

## Boxes

### Box 1: A mathematical framework for population-level interactions

In this contribution, we propose that the occurrence (and intensity) of ecological interactions at the population level relies on several factors, including relative local abundances and local trait distributions. It is important to tease apart these different factors, so as to better disentangle neutral and niche processes. We propose that these different effects can adequately be partitioned using the model

$$\mathbf{A}_{ij} \propto [\mathcal{N}(i, j) \times \mathcal{T}(i, j)] + \epsilon,$$



where  $\mathcal{N}$  is a function giving the probability that species  $i$  and  $j$  interact *based on their relative abundances*, and  $\mathcal{T}$  is a function giving the *per encounter* probability that species  $i$  and  $j$  interact *based on their trait values*. The term  $\epsilon$  accounts for all higher-order effects, such as indirect interactions, local impact of environmental conditions on the interaction, and impact of co-occurring species. Both of these functions can take any form needed. In several papers,  $\mathcal{N}(i, j)$  was expressed as  $\mathbf{n}_i \times \mathbf{n}_j$ , where  $\mathbf{n}$  is a vector of relative abundances (Canard *et al.*, 2012; Vázquez *et al.*, 2007). The expression of  $\mathcal{T}$  can in most cases be derived from mechanistic hypotheses about the observation. For example, Gravel *et al.* (2013) used the niche model of Williams & Martinez (2000) to draw interactions, with the simple rule that  $\mathcal{T}(i, j) = 1$  if  $i$  can consume  $j$  based on allometric rules, and 0 otherwise. Following Rohr *et al.* (2010), the expression of  $\mathcal{T}$  can be based on latent variables rather than actual trait values. This simple formulation could be used to partition, at the level of individual interactions, the relative importance of density-dependent and trait-based processes using variance decomposition. Most importantly, it predicts (i) how each of these components will vary over space and (ii) how the structure of the network will be affected by, for example, changes in local abundances or trait distributions. This model can further be extended in a spatial context, as

$$\mathbf{A}_{ijx} \propto [\mathcal{N}_x(i_x, j_x) \times \mathcal{T}_x(i_x, j_x)] + \epsilon_{ijx},$$

in which  $i_x$  is the population of species  $i$  at site  $x$ . In this formulation, the  $\epsilon$  term could include the spatial variation of interaction between  $i$  and  $j$  over sites, and the covariance between the observed presence of this interaction and the occurrence of species  $i$  and  $j$ . This can, for example, help address situations in which the selection of prey items is determined by traits, but also by behavioral choices. Most importantly, this model differs in that each site  $x$  is characterized by a set of functions  $\mathcal{N}_x, \mathcal{T}_x$ , that may not be identical for all sites considered. For example, the same predator can prefer different prey items in different locations, which will require the use of a different shape for  $\mathcal{T}$  across the range of locations. Gravel *et al.* (2013) show that it is possible to derive robust approximation for the  $\mathcal{T}$  function even with

incomplete set of data, which gives hopes that this framework can be applied even when all species information are not known at all sites (which would be an unrealistic requirement for most realistic systems). Both of these models can be used to partition the variance from existing data, or to test which trait-matching function best describes the observed interactions. They also provide a solid platform for dynamical simulations in that they will allow re-wiring the interaction network as a function of trait change and to generate simulations that are explicit about the variability of interactions.

## Box 2: Population-level interactions in the classical modelling framework

As noted in the main text, most studies of ecological networks—particularly food webs—regard the adjacency matrix  $\mathbf{A}$  as a fixed entity that specifies observable interactions on the basis of whether two species co-occur or not. Given this assumption, there is a lengthy history of trying to understand how the strength or organization of these interactions influence the dynamic behavior of species abundance (May, 1973). Often, such models take the form

$$\frac{dN_i(t)}{dt} = N_i(t) \left( a_i - \sum_{j \neq i} \alpha_{ij} A_{ij} N_j(t) \right),$$

where  $a_i$  is the growth rate of species  $i$  (and could, in principle, depend on other species' abundances  $N$ ) and  $\alpha_{ij}$  is the strength of the effect of  $j$  on  $i$ . In this or just about any related model, direct species-species interaction can influence species abundances but their abundances *never* feedback and influence the *per capita* interactions. They do, however, affect the realized interactions, which are defined by  $\alpha_{ij} N_i(t) N_j(t)$ , something which is also the case when considering more complicated functional responses (Koen-Alonso, 2007).

More recently, there have been multiple attempts to approach the problem from the other way around. Namely, to understand how factors such as species' abundance and/or trait distributions influence the occurrence of the interactions themselves (**Box 1**). One potential drawback to that approach, however, is that it still adopts the assumption that the observation of any interaction  $A_{ij}$  is only an explicit function of the properties of species  $i$  and  $j$ .

Since dynamic models can demonstrate quite clearly that non-interacting species can alter each others' abundances (e.g. via apparent competition (Bonsall & Hassell, 1999)), this is a deeply-ingrained inconsistency between the two approaches. Such a simplification does increase the analytical tractability of the problem (Allesina & Tang, 2012), but there is little, if any, guarantee that it is ecologically accurate. In our opinion, the “higher-effects” term  $\epsilon$  in the models presented in **Box 1** is the one with the least straightforward expectations, but it may also prove to be the most important if we wish to accurately describe all of these indirect effects.

A similar problem actually arises in the typical statistical framework for predicting interaction occurrence. Often, one attempts to “decompose” interactions into the component that is explained by species’ abundances and the component explained by species’ traits (e.g., Box 1). Just like how the underlying functions  $\mathcal{N}$  and  $\mathcal{T}$  could vary across sites, there should also be feedback between species’ abundances and traits, in the same way that we have outlined the feedback between interactions and species’ abundances. In fact, given the increasing evidence for the evolutionary role of species-species interactions in explaining extant biodiversity and their underlying traits (Janzen & Martin, 1982; Herrera *et al.*, 2002), a framework which assumes relative independence of these different phenomenon is likely starting from an overly-simplified perspective.

## References

- Allesina, S. & Levine, J.M. (2011) A competitive network theory of species diversity. *Proceedings of the National Academy of Sciences of the United States of America*, **108**, 5638.
- Allesina, S. & Tang, S. (2012) Stability criteria for complex ecosystems. *Nature*, **483**.
- Angilletta, M.J., Steury, T.D. & Sears, M.W. (2004) Temperature, Growth Rate, and Body Size in Ectotherms: Fitting Pieces of a Life-History Puzzle. *Integrative and Comparative Biology*, **44**, 498–509.
- Araújo, M.B., Rozenfeld, A., Rahbek, C. & Marquet, P.A. (2011) Using species co-occurrence networks to assess the impacts of climate change. *Ecography*, **34**.
- Baiser, B., Gotelli, N.J., Buckley, H.L., Miller, T.E. & Ellison, A.M. (2012) Geographic variation in network structure of a nearctic aquatic food web. *Global Ecology and Biogeography*, **21**, 579–591.
- Baskerville, E.B., Dobson, A.P., Bedford, T., Allesina, S., Anderson, T.M. & Pascual, M. (2011) Spatial Guilds in the Serengeti Food Web Revealed by a Bayesian Group Model. *PLoS Computational Biology*, **7**, e1002321.
- Berlow, E.L., Dunne, J. a, Martinez, N.D., Stark, P.B., Williams, R.J. & Brose, U. (2009) Simple prediction of interaction strengths in complex food webs. *Proceedings of the National Academy of Sciences of the United States of America*, **106**, 187–91.
- Blüthgen, N., Fründ, J., Vázquez, D.P. & Menzel, F. (2008) What do interaction network metrics tell us about specialization and biological traits? *Ecology*, **89**, 3387–99.
- Blüthgen, N., Menzel, F. & Blüthgen, N. (2006) Measuring specialization in species interaction networks. *BMC ecology*, **6**, 9.
- Bolnick, D.I., Amarasekare, P., Araújo, M.S., Bürger, R., Levine, J.M., Novak, M., Rudolf, V.H.W., Schreiber, S.J., Urban, M.C. & Vasseur, D.A. (2011) Why intraspecific trait variation matters in community ecology. *Trends in Ecology & Evolution*, **26**, 183–192.

- Bolnick, D.I., Svanbäck, R., Fordyce, J.A., Yang, L.H., Davis, J.M., Hulsey, C.D. & Forister, M.L. (2003) The ecology of individuals: incidence and implications of individual specialization. *The American Naturalist*, **161**, 1–28.
- Bonsall, M.B. & Hassell, M.P. (1999) Parasitoid-mediated effects: apparent competition and the persistence of host–parasitoid assemblages. *Population Ecology*, **41**.
- Brose, U., Williams, R.J. & Martinez, N.D. (2006) Allometric scaling enhances stability in complex food webs. *Ecology letters*, **9**, 1228–1236.
- Burdon, J.J. & Thrall, P.H. (2009) Coevolution of plants and their pathogens in natural habitats. *Science*, **324**, 755.
- Canard, E., Mouquet, N., Marescot, L., Gaston, K.J., Gravel, D. & Mouillot, D. (2012) Emergence of Structural Patterns in Neutral Trophic Networks. *PLoS ONE*, **7**, e38295.
- Choh, Y., Ignacio, M., Sabelis, M.W. & Janssen, A. (2012) Predator-prey role reversals, juvenile experience and adult antipredator behaviour. *Scientific Reports*, **2**.
- Devictor, V., Clavel, J., Julliard, R., Lavergne, S., Mouillot, D., Thuiller, W., Vénail, P., Villéger, S. & Mouquet, N. (2010) Defining and measuring ecological specialization. *Journal of Applied Ecology*, **47**, 15–25.
- Devictor, V., Mouillot, D., Meynard, C., Jiguet, F., Thuiller, W. & Mouquet, N. (2010) Spatial mismatch and congruence between taxonomic, phylogenetic and functional diversity: the need for integrative conservation strategies in a changing world. *Ecology Letters*, **13**, 1030–1040.
- Diniz-Filho, J.A.F. & Bini, L.M. (2008) Macroecology, global change and the shadow of forgotten ancestors. *Global Ecology and Biogeography*, **17**, 11–17.
- Duffy, J.E., Cardinale, B.J., France, K.E., McIntyre, P.B., Thébault, E. & Loreau, M. (2007) The functional role of biodiversity in ecosystems: incorporating trophic complexity. *Ecology Letters*, **10**, 522–538.
- Dunne, J.A. (2006) *The Network Structure of Food Webs*. *Ecological networks: Linking structure and dynamics* (ed. by J.A. Dunne) and M. Pascual), pp. 27–86. Oxford University Press.

- Dunne, J.A., Williams, R.J. & Martinez, N.D. (2002) Network structure and biodiversity loss in food webs: robustness increases with connectance. *Ecology Letters*, **5**, 558–567.
- Dáttilo, W., Guimarães, P.R. & Izzo, T.J. (2013) Spatial structure of ant–plant mutualistic networks. *Oikos*, no–no.
- Eklof, A., Helmus, M.R., Moore, M., Allesina, S. & Eklöf, A. (2011) Relevance of evolutionary history for food web structure. *Proceedings of the Royal Society B: Biological Sciences*, **279**, 1588–1596.
- Estes, J.A., Terborgh, J., Brashares, J.S., Power, M.E., Berger, J., Bond, W.J., Carpenter, S.R., Essington, T.E., Holt, R.D., Jackson, J.B.C., Marquis, R.J., Oksanen, L., Oksanen, T., Paine, R.T., Pikitch, E.K., Ripple, W.J., Sandin, S.A., Scheffer, M., Schoener, T.W., Shurin, J.B., Sinclair, A.R.E., Soule, M.E., Virtanen, R. & Wardle, D.A. (2011) Trophic Downgrading of Planet Earth. *Science*, **333**, 301–306.
- Eveleigh, E.S., McCann, K.S., McCarthy, P.C., Pollock, S.J., Lucarotti, C.J., Morin, B., McDougall, G. a, Strongman, D.B., Huber, J.T., Umbanhowar, J. & Faria, L.D.B. (2007) Fluctuations in density of an outbreak species drive diversity cascades in food webs. *Proceedings of the National Academy of Sciences of the United States of America*, **104**, 16976–16981.
- Gandon, S., Buckling, A., Decaestecker, E. & Day, T. (2008) Host-parasite coevolution and patterns of adaptation across time and space. *Journal of Evolutionary Biology*, **21**, 1861–1866.
- Gilman, S.E., Urban, M.C., Tewksbury, J., Gilchrist, G.W. & Holt, R.D. (2010) A framework for community interactions under climate change. *Trends in Ecology & Evolution*, **25**, 325–331.
- Golubski, A.J. & Abrams, P.A. (2011) Modifying modifiers: what happens when interspecific interactions interact? *Journal of Animal Ecology*, **80**, 1097–1108.
- Gomulkiewicz, R., Thompson, J.N., Holt, R.D., Nuismer, S.L. & Hochberg, M.E. (2000) Hot spots, cold spots, and the geographic mosaic theory of coevolution. *The American Naturalist*, **156**, 156–174.
- Gravel, D., Massol, F., Canard, E., Mouillot, D. & Mouquet, N. (2011) Trophic theory of island biogeography. *Ecology Letters*, **14**, 1010–1016.

- Gravel, D., Poisot, T., Albouy, C., Velez, L. & Mouillot, D. (2013) Inferring food web structure from predator-prey body size relationships. *Methods in Ecology and Evolution*.
- Havens, K. (1992) Scale and structure in natural food webs. *Science*, **257**.
- Heil, M. & McKey, D. (2003) Protective ant-plant interactions as model systems in ecological and evolutionary research. *Annual Review of Ecology, Evolution, and Systematics*, **34**, 425–553.
- Herrera, C.M., Medrano, M., Rey, P.J., Sánchez-Lafuente, A.M., García, M.B., Guitián, J. & Manzaneda, A.J. (2002) Interaction of pollinators and herbivores on plant fitness suggests a pathway for correlated evolution of mutualism-and antagonism-related traits. *Proceedings of the National Academy of Sciences*, **99**, 16823–16828.
- Hubbell, S.P. *The Unified Neutral Theory of Biodiversity and Biogeography*, Princeton University Press, Princeton.
- Ings, T.C., Montoya, J.M., Bascompte, J., Blüthgen, N., Brown, L., Dormann, C.F., Edwards, F., Figueroa, D., Jacob, U., Jones, J.I., Lauridsen, R.B., Ledger, M.E., Lewis, H.M., Olesen, J.M., van Veen, F.J.F., Warren, P.H. & Woodward, G. (2009) Ecological networks—beyond food webs. *Journal of Animal Ecology*, **78**.
- Janzen, D.H. & Martin, P.S. (1982) Neotropical anachronisms: the fruits the gomphotheres ate. *Science*, **215**, 19–27.
- Koch, H. & Schmid-Hempel, P. (2011) Socially transmitted gut microbiota protect bumble bees against an intestinal parasite. *PNAS*.
- Koen-Alonso, M. (2007) *A process-oriented approach to the multispecies functional response. From energetics to ecosystems: the dynamics and structure of ecological systems*, pp. 1–36. Springer.
- Krishna, A., Guimarães Jr, P.R., Jordano, P. & Bascompte, J. (2008) A neutral-niche theory of nestedness in mutualistic networks. *Oikos*, **117**, 1609–1618.
- Kéfi, S., Berlow, E.L., Wieters, E.A., Navarrete, S.A., Petchey, O.L., Wood, S.A., Boit, A., Joppa, L.N., Lafferty, K.D., Williams, R.J., Martinez, N.D., Menge, B.A., Blanchette, C.A., Iles, A.C. & Brose, U. (2012) More than a meal\textbackslashldots integrating non-feeding interactions



into food webs. *Ecology letters*, **15**.

May, R.M. (1973) Stability in randomly fluctuating versus deterministic environments. *American Naturalist*.

Memmott, J., Waser, N.M. & Price, M.V. (2004) Tolerance of pollination networks to species extinctions. *Proceedings of the Royal Society B: Biological Sciences*, **271**, 2605–2611.

Menke, S., Böhning-Gaese, K. & Schleuning, M. (2012) Plant-frugivore networks are less specialized and more robust at forest-farmland edges than in the interior of a tropical forest. *Oikos*, **121**, 1553–1566.

Meynard, C.N., Devictor, V., Mouillot, D., Thuiller, W., Jiguet, F. & Mouquet, N. (2011) Beyond taxonomic diversity patterns: how do  $\alpha$ ,  $\beta$  and  $\gamma$  components of bird functional and phylogenetic diversity respond to environmental gradients across France? *Global Ecology and Biogeography*, **20**, 893–903.

Nuismer, S.L., Thompson, J.N. & Gomulkiewicz, R. (2003) Coevolution between hosts and parasites with partially overlapping geographic ranges. *Journal of Evolutionary Biology*, **16**, 1337–1345.

Ohba, S.-y. (2011) Field observation of predation on a turtle by a giant water bug. *Entomological Science*, **14**, 364–365.

Olesen, J.M., Bascompte, J., Dupont, Y.L., Elberling, H., Rasmussen, C. & Jordano, P. (2011) Missing and forbidden links in mutualistic networks. *Proceedings. Biological sciences / The Royal Society*, **278**, 725–32.

Olivier, L. (2012) Are Opportunistic Pathogens Able to Sense the Weakness of Host through Specific Detection of Human Hormone? *Journal of Bacteriology & Parasitology*.

Piechnik, D.A., Lawler, S.P. & Martinez, N.D. (2008) Food-web assembly during a classic biogeographic study: species’ trophic breadth corresponds to colonization order. *Oikos*, **117**, 665–674.

Poisot, T., Canard, E., Mouillot, D., Mouquet, N. & Gravel, D. (2012) The dissimilarity of

species interaction networks. *Ecology Letters*, **15**, 1353–1361.

Poisot, T., Lepennetier, G., Martinez, E., Ramsayer, J. & Hochberg, M.E. (2011) Resource availability affects the structure of a natural bacteria-bacteriophage community. *Biology Letters*, **7**, 201–204.

Price, P.W. *Macroevolutionary Theory on Macroecological Patterns*, Cambridge University Press, Cambridge.

Rezende, E.L., Lavabre, J.E., Guimarães, P.R., Jordano, P. & Bascompte, J. (2007) Non-random coextinctions in phylogenetically structured mutualistic networks. *Nature*, **448**.

Rodriguez-Cabal, M.A., Barrios-Garcia, M.N., Amico, G.C., Aizen, M.A. & Sanders, N.J. (2013) Node-by-node disassembly of a mutualistic interaction web driven by species introductions. *Proceedings of the National Academy of Sciences*, **110**, 16503–16507.

Rohr, R.P., Scherer, H., Kehrli, P., Mazza, C. & Bersier, L.-F. (2010) Modeling food webs: exploring unexplained structure using latent traits. *The American naturalist*, **176**, 170–7.

Saavedra, S., Stouffer, D.B., Uzzi, B. & Bascompte, J. (2011) Strong contributors to network persistence are the most vulnerable to extinction. *Nature*, **478**, 233–235.

Sanders, D. & van Veen, F.J.F. (2012) Indirect commensalism promotes persistence of secondary consumer species. *Biology letters*, 960–963.

Schleuning, M., Blüthgen, N., Flörchinger, M., Braun, J., Schaefer, H.M. & Böhning-Gaese, K. (2011) Specialization and interaction strength in a tropical plant-frugivore network differ among forest strata. *Ecology*, **92**, 26–36.

Schleuning, M., Fründ, J., Klein, A.-m., Abrahamczyk, S., Alarcón, R., Albrecht, M., Andersson, G.K.S., Bazarrian, S., Böhning-Gaese, K., Bommarco, R., Dalsgaard, B., Dehling, D.M., Gotlieb, A., Hagen, M., Hickler, T., Holzschuh, A., Kaiser-Bunbury, C.N., Kreft, H., Morris, R.J., Sandel, B., Sutherland, W.J., Svenning, J.-c., Tcharntke, T., Watts, S., Weiner, C.N., Werner, M., Williams, N.M., Winqvist, C., Dormann, C.F. & Blüthgen, N. (2012) Specialization of Mutualistic Interaction Networks Decreases toward Tropical Latitudes. *Current biology*, **22**, 1925–31.

- Singer, M.C., Carriere, Y., Theuring, C. & Hartmann, T. (2004) Disentangling food quality from resistance against parasitoids: diet choice by a generalist caterpillar. *The American Naturalist*, **164**, 423–429.
- Singer, M.S., Farkas, T.E., Skorik, C.M. & Mooney, K. a (2012) Tritrophic interactions at a community level: effects of host plant species quality on bird predation of caterpillars. *The American naturalist*, **179**, 363–74.
- Stouffer, D.B. & Bascompte, J. (2011) Compartmentalization increases food-web persistence. *Proceedings of the National Academy of Sciences of the United States of America*, **108**, 3648–3652.
- Stouffer, D.B., Camacho, J., Guimera, R., Ng, C.A. & Amaral, L.A.N. (2005) Quantitative patterns in the structure of model and empirical food webs. *Ecology*, **86**, 1301–1311.
- Stouffer, D.B., Sales-Pardo, M., Sirer, M.I. & Bascompte, J. (2012) Evolutionary Conservation of Species' Roles in Food Webs. *Science*, **335**, 1489–1492.
- Thompson, J.N. (2005) *The Geographic Mosaic of Coevolution*, University Of Chicago Press.
- Thuiller, W., Münkemüller, T., Lavergne, S., Mouillot, D., Mouquet, N., Schiffrers, K. & Gravel, D. (2013) A road map for integrating eco-evolutionary processes into biodiversity models. *Ecology Letters*, **16**, 94–105.
- Tylianakis, J.M., Tscharntke, T. & Lewis, O.T. (2007) Habitat modification alters the structure of tropical host–parasitoid food webs. *Nature*, **445**, 202–205.
- Vazquez, D.P., Poulin, R., Krasnov, B.R. & Shenbrot, G.I. (2005) Species abundance and the distribution of specialization in host-parasite interaction networks. *Journal of Animal Ecology*, **74**, 946–955.
- Violle, C., Enquist, B.J., McGill, B.J., Jiang, L., Albert, C.H., Hulshof, C., Jung, V. & Messier, J. (2012) The return of the variance: intraspecific variability in community ecology. *Trends in ecology & evolution*, **27**.
- Vázquez, D.P., Melián, C.J., Williams, N.M., Blüthgen, N., Krasnov, B.R. & Poulin, R. (2007) Species abundance and asymmetric interaction strength in ecological networks. *Oikos*, **116**,

1120–1127.

Williams, R.J. & Martinez, N.D. (2000) Simple rules yield complex food webs. *Nature*, **404**, 180–183.

Woodward, G., Benstead, J.P., Beveridge, O.S., Blanchard, J., Brey, T., Brown, L.E., Cross, W.F., Friberg, N., Ings, T.C. & Jacob, U. (2010) Ecological networks in a changing climate. *Advances in Ecological Research*, **42**, 71–138.

Woodward, G., Brown, L.E., Edwards, F.K., Hudson, L.N., Milner, A.M., Reuman, D.C. & Ledger, M.E. (2012) Climate change impacts in multispecies systems: drought alters food web size structure in a field experiment. *Philosophical Transactions of the Royal Society B: Biological Sciences*, **367**, 2990–2997.

Wootton, J.T. (2005) Field parameterization and experimental test of the neutral theory of biodiversity. *Nature*, **433**, 309–12.

Yeakel, J.D., Guimaraes, P.R., Novak, M., Fox-Dobbs, K. & Koch, P.L. (2012) Probabilistic patterns of interaction: the effects of link-strength variability on food web structure. *Journal of The Royal Society Interface*, rsif.2012.0481.
